# Supplementary material for: A Quantitative Investigation on Awareness of Renewable Energy Building Technology in the United Arab Emirates
Source: MDPI journal article supplement (doi:10.3390/su13126665), 2021-06-11

# Solar Panels Application and Design: End-User Perception in the GCC

This research is part of a Summer Undergraduate Research Experience (SURE Plus) 2019 Project facilitated by UAE University. We will like to know what you think about using solar panels on your house.

This survey takes about 5 minutes, and has pictures and options to give you a great idea of this innovative technology.

Thank you in advance for your time and participation.

For more information please contact:

Daniel Attoye  
PhD Candidate & Research Assistant  
Architectural Engineering Department,  
United Arab Emirates University, Al Ain, UAE  
[201590088@uaeu.ac.ae](mailto:201590088@uaeu.ac.ae)

\* Required

## Demographic Information

1. Gender: What is your gender? \*

*Mark only one oval.*

- ☐ Female  
☐ Male

2. UAE Emirate: Where do you live in the UAE? \*

*Mark only one oval.*

- ☐ Abu Dhabi  
☐ Ajman  
☐ Dubai  
☐ Fujairah  
☐ Ras Al Khaimah  
☐ Sharjah  
☐ Umm Al Quwaim

## 3. Age: What is your age? \*

Mark only one oval.

- ☐ 16 - 20
- ☐ 21 - 25
- ☐ 26 - 30
- ☐ 31 - 35
- ☐ 36 - 40
- ☐ 41 - 45
- ☐ 46 - 50
- ☐ 51 and above

## Degree Major/Occupational background

## 4. What is/was your major? (E.g. Civil Engineering) \*

---

## BIPV Awareness and Interest

## 5. Have you heard about using solar panels on or as part of a house? \*

Mark only one oval.

- ☐ Yes
- ☐ No

## 6. What do you think about it? \*

Mark only one oval.

- ☐ I like it
- ☐ I don't know/I don't like it

## BIPV Basics

Included here in the questionnaire were some pictures to show examples of BIPV

## BIPV Benefits

Included here in the questionnaire were some notes to explain the benefits of BIPV

BIPV  
Location

What part of the building will you prefer to put solar panels on?

Included here in the questionnaire was a building with arrows pointing to different locations for installing BIPV

7. In what order do you prefer these options? \*

Mark only one oval per row.

|                                | 1st                   | 2nd                   | 3rd                   | 4th                   | I do not want this    |
|--------------------------------|-----------------------|-----------------------|-----------------------|-----------------------|-----------------------|
| Roof                           | <input type="radio"/> |
| Window                         | <input type="radio"/> |
| Wall                           | <input type="radio"/> |
| Other (Balcony, Ground e.t.c.) | <input type="radio"/> |

BIPV Alternatives

8. In what order do you prefer these options? \*

Mark only one oval per row.

|                   | 1st                   | 2nd                   | 3rd                   | I do not want this    |
|-------------------|-----------------------|-----------------------|-----------------------|-----------------------|
| Beauty            | <input type="radio"/> | <input type="radio"/> | <input type="radio"/> | <input type="radio"/> |
| Cost              | <input type="radio"/> | <input type="radio"/> | <input type="radio"/> | <input type="radio"/> |
| Power/Performance | <input type="radio"/> | <input type="radio"/> | <input type="radio"/> | <input type="radio"/> |

Feedback

THANK YOU SO MUCH FOR PARTICIPATING!

9. (Optional) Please provide your email address for further communication

This content is neither created nor endorsed by Google.

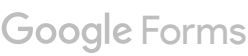

Supplement: s1 [file s1]
