# Supplementary material for: A Quantitative Investigation on Awareness of Renewable Energy Building Technology in the United Arab Emirates
Source: MDPI journal article supplement (doi:10.3390/su13126665), 2021-06-11
Supplement: s1 [file s1]

Archive with 1 entries (1 files):
- sustainability-1207931-supplementary.pdf
